# Supplementary material for: The role of alkylamine in the stabilization of CuO nanoparticles as a determinant of the Al/CuO redox reaction
Source: Royal Society of Chemistry journal article supplement (doi:10.1039/c9cp02220a), 2019-01-01
Supplement: c9cp02220a1.pdf [file c9cp02220a1.pdf]

## **The role of alkylamine in the stabilization of CuO nanoparticles as a determinant of the Al/CuO redox reaction**

Sécolène Palussière,<sup>a,b</sup> Jérémy Cure,<sup>b</sup> Andrea Nicollet,<sup>a</sup> Pierre Fau,<sup>b</sup> Katia Fajerweg,<sup>b</sup>  
Myrtil L. Kahn,<sup>b</sup> Alain Estève,<sup>a</sup> Carole Rossi\*<sup>a</sup>

<sup>a</sup> LAAS-CNRS, The University of Toulouse, 7 Avenue du colonel Roche, F-31400 Toulouse, France

<sup>b</sup> LCC, The University of Toulouse, 205 Route de Narbonne, F-31400 Toulouse, France

### S1. Mass spectra of CuO<sub>air</sub> (a) and CuO<sub>O<sub>2</sub></sub> (b).

Mass spectrometry analyses of both synthesized CuO NPs are performed upon heating ( $10^{\circ}\text{C}\cdot\text{min}^{-1}$ ) under argon atmosphere. Figure S1 shows MS results for both CuO<sub>air</sub> and CuO<sub>O<sub>2</sub></sub>. All detected m/z species, during the CuO<sub>air</sub> and CuO<sub>O<sub>2</sub></sub> ramping are given in Table S1.

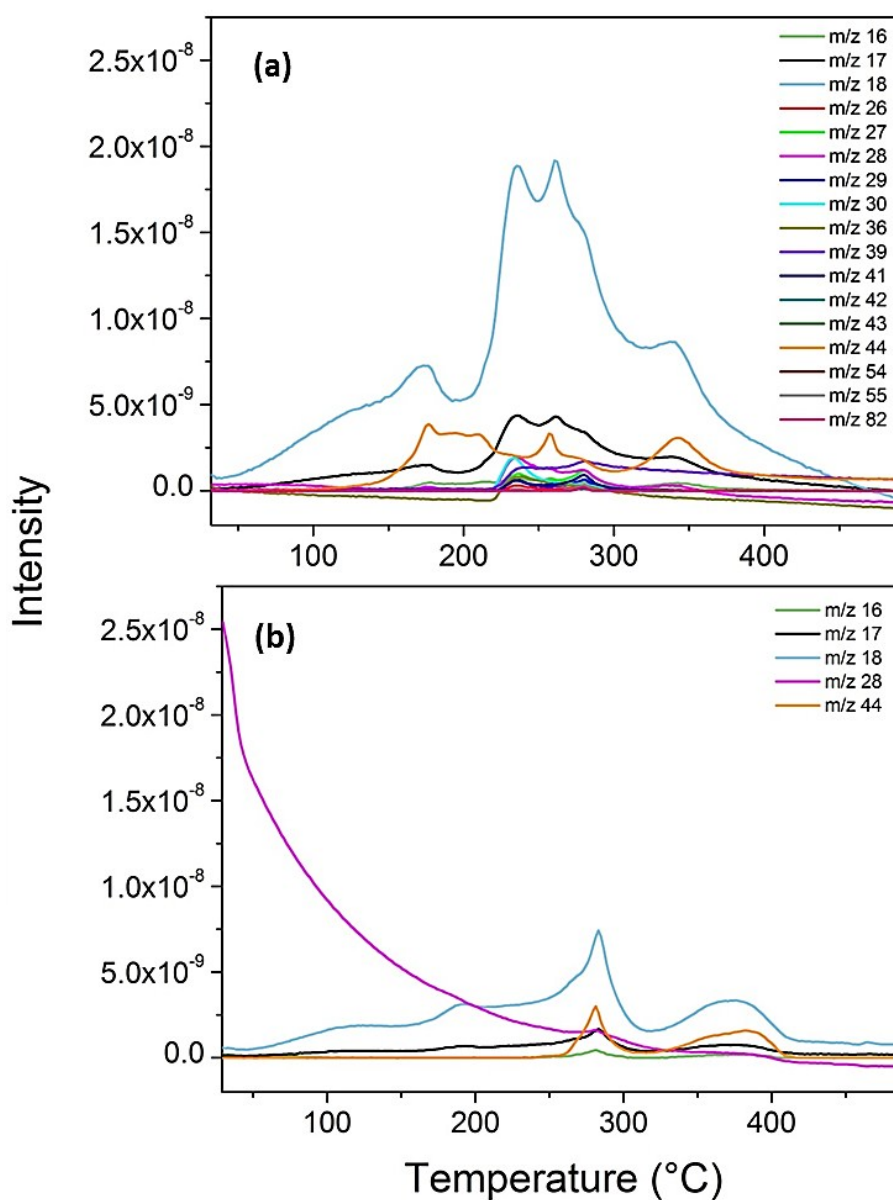

**Figure S1.** Mass spectra of (a) CuO<sub>air</sub> and (b) CuO<sub>O<sub>2</sub></sub>.

**Table S1.** Common neutral fragments present in mass spectra:[1]

| m/z | Molecules fragments                                                   | m/z | Molecules fragments                                                                                                       |
|-----|-----------------------------------------------------------------------|-----|---------------------------------------------------------------------------------------------------------------------------|
| 16  | CH <sub>3</sub>                                                       | 39  | C <sub>3</sub> H <sub>3</sub> , HC <sub>2</sub> N                                                                         |
| 17  | OH                                                                    | 41  | CH <sub>2</sub> =CHCH <sub>2</sub> <sup>•</sup>                                                                           |
| 18  | H <sub>2</sub> O                                                      | 42  | CH <sub>2</sub> =CHCH <sub>3</sub> <sup>•</sup> , CH <sub>2</sub> =C=O, NCO, NCNH <sub>2</sub>                            |
| 26  | CH≡CH, <sup>•</sup> C≡N                                               | 43  | C <sub>3</sub> H <sub>7</sub> <sup>•</sup> , CH <sub>3</sub> C=O <sup>•</sup> , CH <sub>2</sub> =CH-O <sup>•</sup> , HCNO |
| 27  | CH <sub>2</sub> =CH <sup>•</sup> , HC≡N                               | 44  | CO <sub>2</sub>                                                                                                           |
| 28  | CO                                                                    | 54  | CH <sub>2</sub> =CH-CH=CH <sub>2</sub>                                                                                    |
| 29  | CH <sub>3</sub> -CH <sub>2</sub> <sup>•</sup> , <sup>•</sup> CHO      | 55  | CH <sub>2</sub> =CHCHCH <sub>3</sub>                                                                                      |
| 30  | NH <sub>2</sub> -CH <sub>2</sub> <sup>•</sup> , CH <sub>2</sub> O, NO | 82  | CH≡C-(CH <sub>2</sub> ) <sub>4</sub>                                                                                      |
| 36  | 2 H <sub>2</sub> O                                                    |     |                                                                                                                           |

## S2. Kinetics of CO<sub>2</sub> (a) and H<sub>2</sub>O (b) MS signal intensity

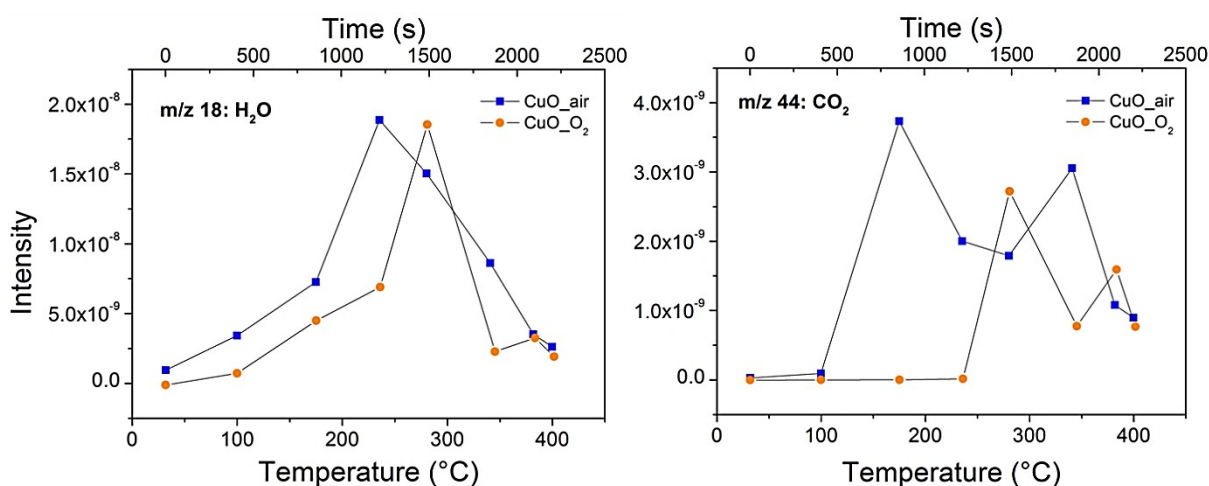

**Figure S2.** Evolution of the signal intensity for (a) CO<sub>2</sub> (m/z 44) and (b) H<sub>2</sub>O (m/z 18) as a function of temperature and time (kinetics).

## S3. FTIR analysis of CuO<sub>air</sub>, CuO<sub>O<sub>2</sub></sub> samples after being washed

Cuprite phonon modes at 616 cm<sup>-1</sup> is evidenced at 200 °C for both samples, whereas they disappear at 500 °C when copper is formed. These effects are even stronger for

CuO<sub>air</sub> with the formation of copper at 200 °C, due to the larger quantity of ligands and water at the surface.

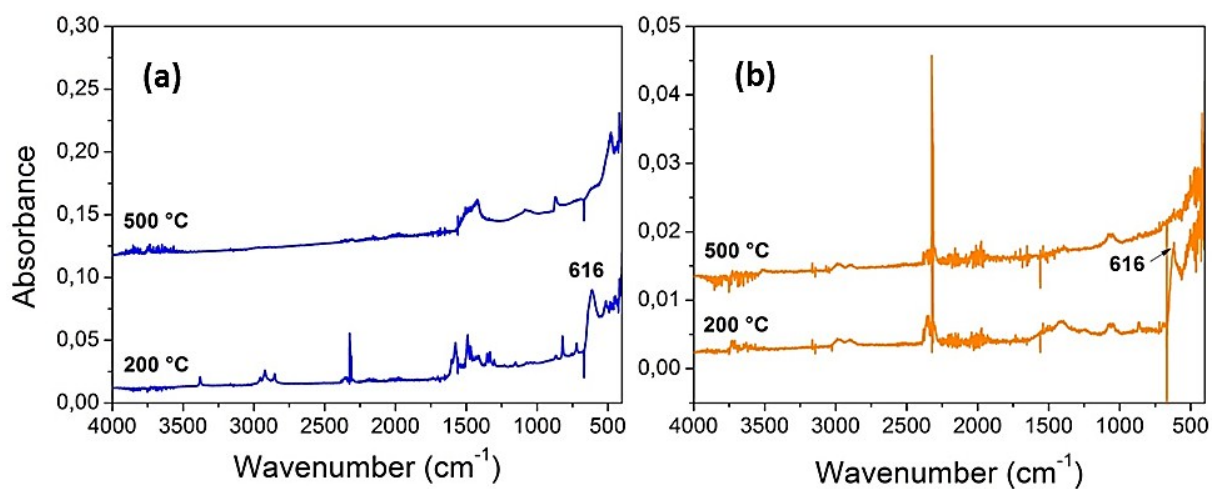

**Figure S3.** FTIR spectra of annealed (a) CuO<sub>air</sub> and (b) CuO<sub>O<sub>2</sub></sub> at 500 and 200 °C under argon.

#### **S4. X-Ray analysis of CuO<sub>com</sub> annealed at 200 and 500 °C under argon.**

The initial CuO<sub>com</sub> structure doesn't change until 500 °C, pointing the crucial role of the ligands in the CuO reduction process below 500 °C observed for CuO<sub>air</sub> and CuO<sub>O<sub>2</sub></sub>.

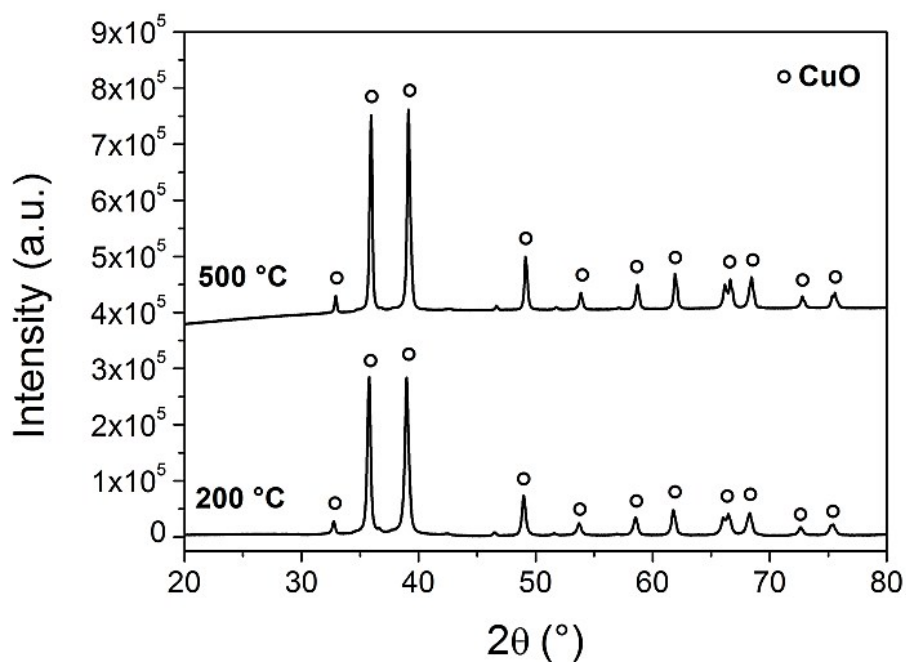

**Figure S4.** X-ray diffraction patterns of CuO \_com at 200 and 500 °C upon annealing with a ramping of 10°C.min<sup>-1</sup> and under argon.

**S5. Chemical analysis of commercial CuO nanoparticles functionalized with one monolayer of OA ligands.**

The FTIR characterization of CuO\_com@OA shows alkyl chain of OA at the stretching mode in the area of 3000 cm<sup>-1</sup>, proving that bonding is realized between OA and commercial CuO. Mixed with Al NPs, the thermal response shows an exothermic peak at 258 °C (o), two others ones at 580 (i) and 783 °C (j) identified as reaction between Al and CuO NPs. Before 500 °C, the exothermic peak is therefore associated to OA oxidation. XRD analysis, of annealed CuO\_com@OA demonstrates that at 500 °C, CuO phase is partially reduced into Cu<sub>2</sub>O and Cu phases. The CuO\_com@OA mixed with Al exhibits a heat released of 0.79 kJ.g<sup>-1</sup> between 450 and 900 °C. This points out the role of OA in the reduction process of CuO nanoparticles but also that the CuO

remaining in the system after 500 °C, allows the exotherms reactions. Therefore, CuO nanoparticles size has to be taken into account to avoid reduction.

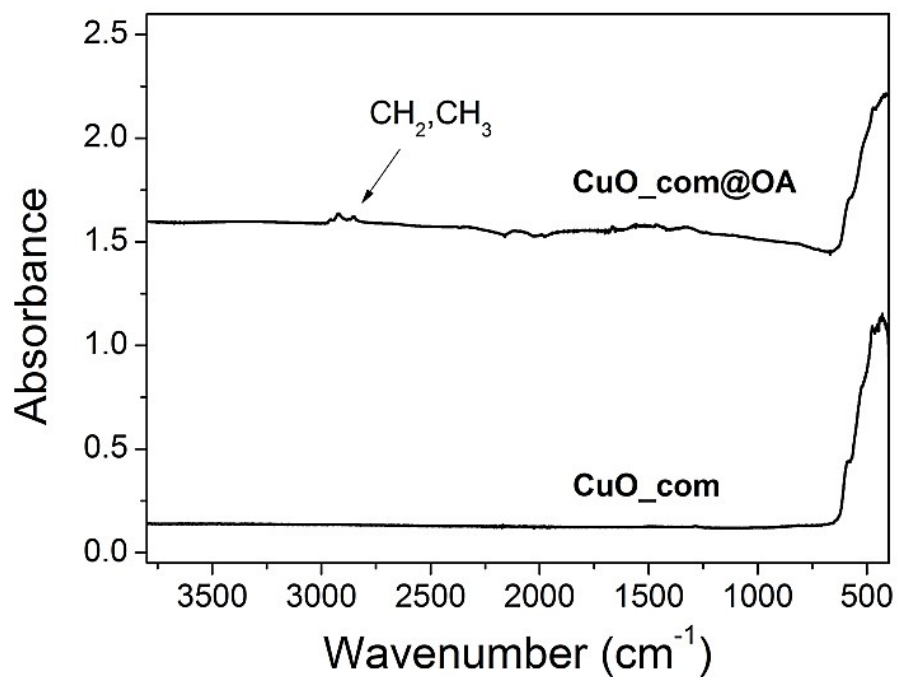

**Figure S5a.** FTIR spectra of CuO<sub>com</sub> and CuO<sub>com</sub> functionalized with OA. At around 3000 cm<sup>-1</sup>, stretching mode of alkyl chain is identified.

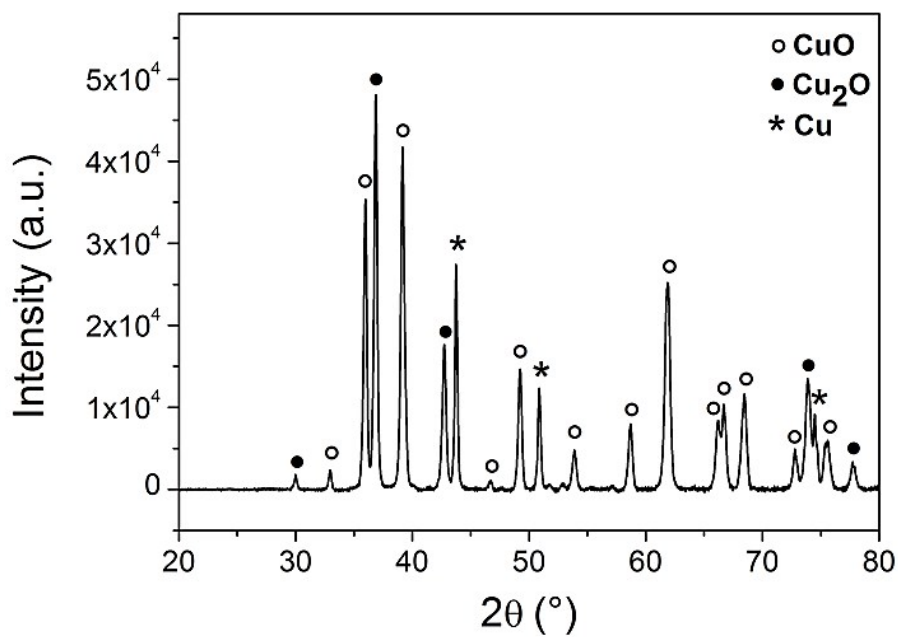

**Figure S5b.** X-ray diffraction pattern of CuO\_com@OA annealed at 500°C under argon.

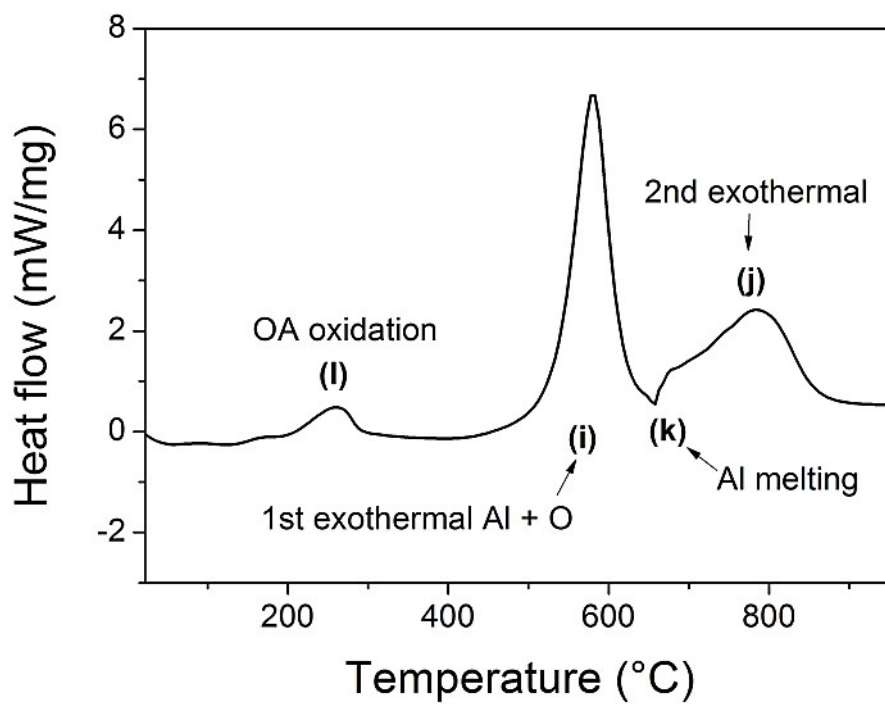

**Figure S5c.** DSC curve of Al/CuO\_com@OA.

## S6. EDX analysis of mixtures composed of Al/annealed CuO NPs

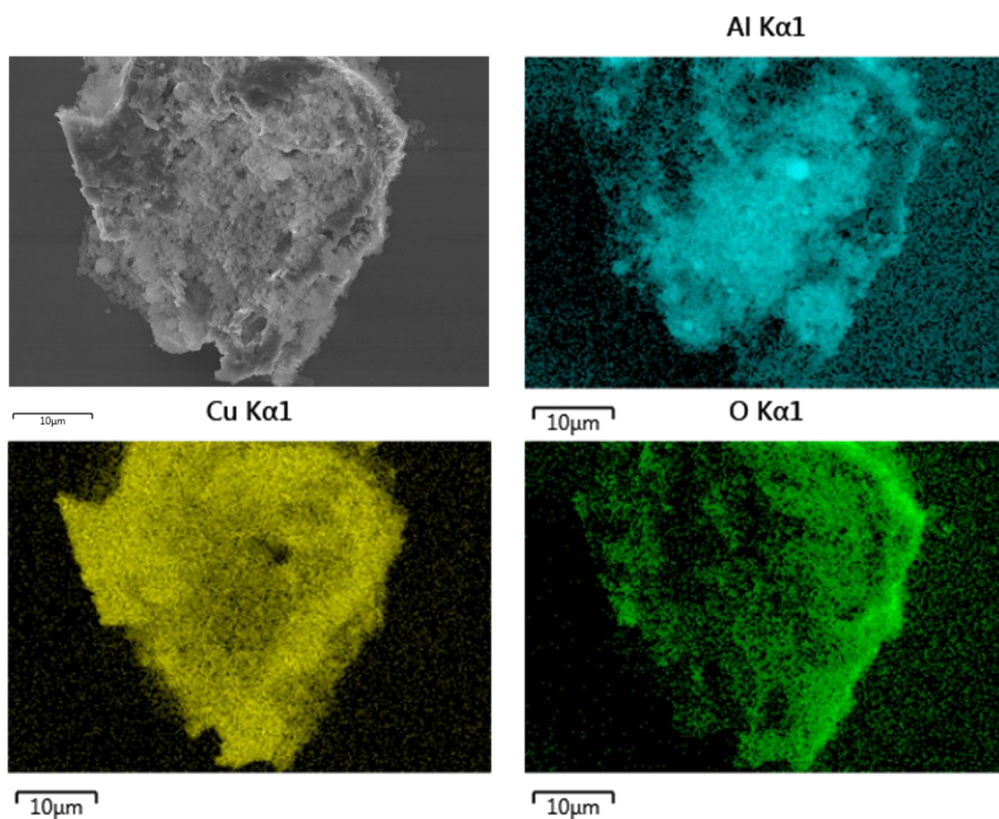

**Figure S6.** SEM image of assembly Al/annealed CuO<sub>2</sub>\_air with associated EDS analyses for Al, Cu and O elements.

## References

- [1] C. Bullen, P. Mulvaney, The Effects of Chemisorption on the Luminescence of CdSe Quantum Dots, *Langmuir*. 22 (2006) 3007–3013.
